# Supplementary material for: Sulfonated Starch-Graft-Polyaniline@Graphene Electrically Conductive Nanocomposite: Application for Tyrosinase Immobilization
Source: MDPI journal article supplement (doi:10.3390/bios12110939), 2022-10-28
Supplement: s1 [file s1]

# Sulfonated Starch-*Graft*-Polyaniline@Graphene Electrically Conductive Nanocomposite: Application for Tyrosinase Immobilization

<sup>1</sup> School of Chemistry, Damghan University, Damghan 36716-41167, Iran

<sup>2</sup> School of Biology, Damghan University, Damghan 36716-41167, Iran

<sup>3</sup> Centre for Materials Interface, Istituto Italiano di Tecnologia, Viale Rinaldo Piaggio 34, Pontedera, 56025 Pisa, Italy

\* Correspondence: e.nazarzadeh@du.ac.ir (E.N.Z.); pooyan.makvandi@iit.it (P.M.)

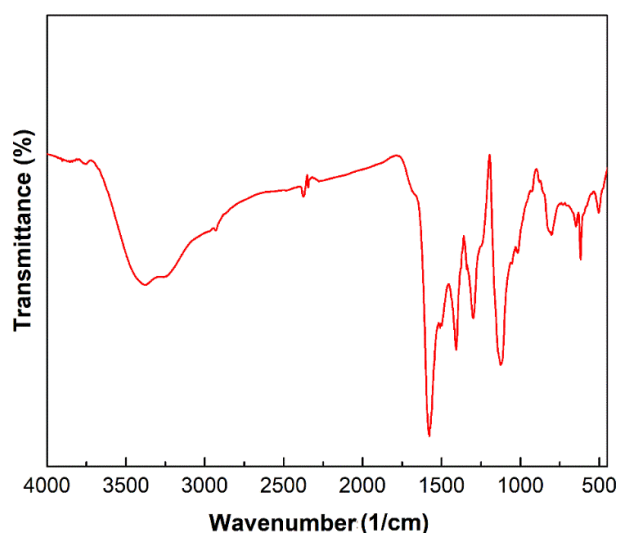

**Figure S1.** FTIR spectrum of polyaniline (PANI).

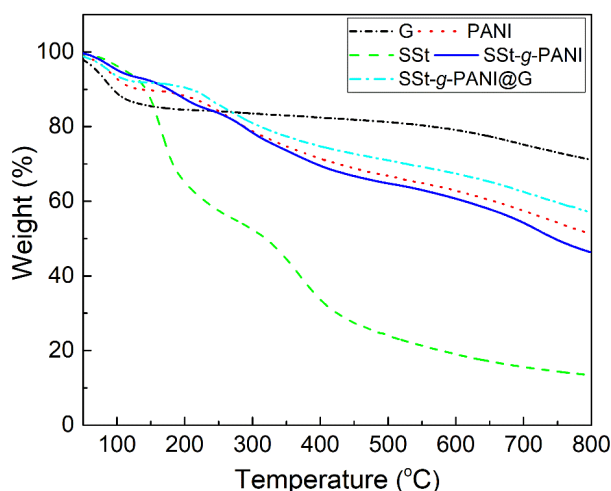

**Figure S2.** TGA thermograms of graphene (G), net polyaniline (PANI), sulfonated starch (SSt), sulfonated starch graft polyaniline copolymer (SSt-g-PANI) and sulfonated starch graft polyaniline copolymer@graphene nanocomposites (SSt-g-PANI@G).

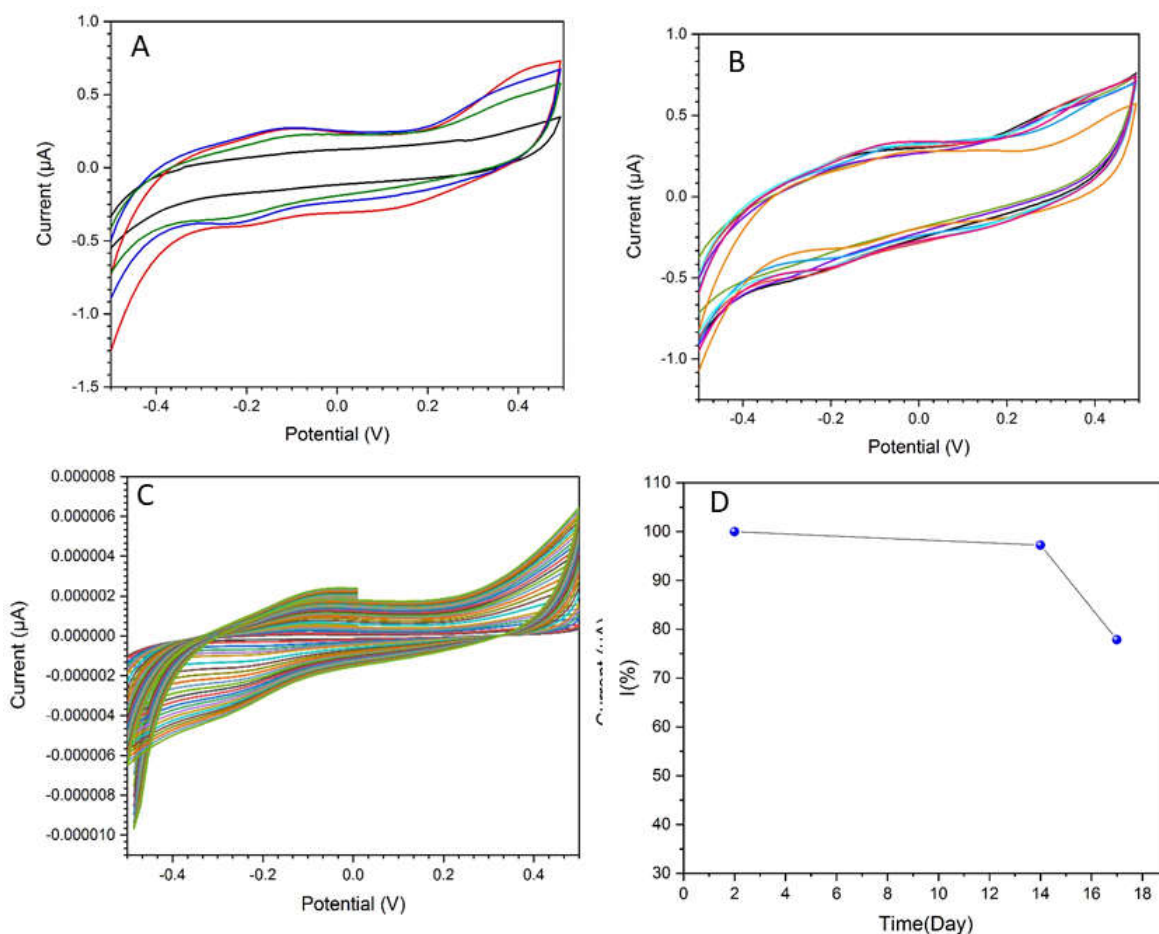

**Figure S3.** (A) CVs of different electrodes in 10 mL phosphate buffer 0.1 M (pH 6.8) at a scan rate of  $100 \text{ mV s}^{-1}$  for SSt-g-PANI@G nanocomposites. Bare electrodes (blue curves), modified electrodes with nanocomposite (orange curves), and modified electrodes with nanocomposite and tyrosinase enzyme (green curves). (B) The CVs of the effect of different pHs (6.5 to 8) on the electrochemical behavior of modified SSt-g-PANI@G/tyrosinase/GCE electrode at a scanning speed of  $100 \text{ mV s}^{-1}$ . Bare electrode (black), second day (red), fourteenth day (blue), and seventeenth day (green) of SSt-g-PANI@G/tyrosinase/GCE electrode. (C) Cyclic voltammetry of the different electrodes in 10 mL phosphate buffer 0.1 M (pH 6.8) at different scan rates ( $10\text{--}1000 \text{ mV s}^{-1}$ ). (D) Time stability diagram of SSt-g-PANI@G/tyrosinase/GCE biosensor obtained from *in-situ* (circle) and solution mixing (square) methods during 17 days.
